# Supplementary material for: Clinical and Molecular Characterization of a Novel Homozygous Frameshift Variant in AEBP1-Related Classical-like Ehlers Danlos Syndrome Type 2 with Comparison to Previously Reported Rare Cases
Source: MDPI journal article supplement (doi:10.3390/genes15040461), 2024-04-06
Supplement: s1 [file s1]

## Supplementary Information

Table S1. Comprehensive clinical and molecular features reported in individuals with cIEDS2.

| Family No.                                | I                                                  |                                      | II                                                  | III                                | IV                                   | V                                      | VI                      |                        | VII                                      | VIII                                 | IX                     | X                               | XI                     | XII                          | XIII                                 |
|-------------------------------------------|----------------------------------------------------|--------------------------------------|-----------------------------------------------------|------------------------------------|--------------------------------------|----------------------------------------|-------------------------|------------------------|------------------------------------------|--------------------------------------|------------------------|---------------------------------|------------------------|------------------------------|--------------------------------------|
| Patient No.                               | 1                                                  | 2                                    | 3                                                   | 4                                  | 5                                    | 6                                      | 7                       | 8                      | 9                                        | 10                                   | 11                     | 12                              | 13                     | 14                           | 15                                   |
| Citations                                 | Alazami et al. (2016)<br>Maddirevula et al. (2020) |                                      | Blackburn et al. (2018)<br>Vishwanath et al. (2020) |                                    | Syx et al. (2019)                    |                                        | Hebebrand et al. (2019) |                        | Ritelli et al. (2019)                    | Di Giosaffatte et al. (2022)         | Sanai et al. (2022)    | Angwin (2023)                   |                        | Yamaguchi et al. (2023)      | This Paper                           |
| Age (at the reported time)                | 12                                                 | 24                                   | 35                                                  | 33                                 | 58                                   | 21                                     | 39                      | 38                     | 53                                       | 26                                   | 35                     | 62                              | 41                     | 45                           | 16                                   |
| Sex                                       | Female                                             | Male                                 | Male                                                | Male                               | Male                                 | Female                                 | Female                  | Male                   | Female                                   | Male                                 | Female                 | Female                          | Female                 | Female                       | Female                               |
| Ethnicity                                 | Middle Eastern                                     | Middle Eastern                       | Caucasian                                           | Caucasian                          | Caucasian                            | Caucasian                              | Greek                   | Greek                  | Italian                                  | NA                                   | Japanese               | Caucasian                       | Caucasian              | Japanese                     | Syrian                               |
| AEBP1 variant (NM_001129.5)               | c.[1630 + 1G>A]; [1630 + 1G>A]                     | c.[1630 + 1G>A]; [1630 + 1G>A]       | c.[1470 del]; [1743C >A]                            | c.[1320_1326del]; [1320_1326del]   | c.[362dup]; [362dup]                 | c.[443dup]; [1149_1150+2del]           | c.[917dup]; [917dup]    | c.[917dup]; [917dup]   | c.[1925T>C]; [1925T>C]                   | c.[2123_2124del]; [2123_2124del]     | c.[1894C>T]; [1894C>T] | c.[821del]; [2248T>C]           | c.[1012G>T]; [1930C>T] | c.[2296G>T]; [2383dup]       | c.[2923del]; [2923del]               |
| Protein alteration (NP_001120.3)          | p.[Val537Leufs*31]; [Val537Leufs*31]               | p.[Val537Leufs*31]; [Val537Leufs*31] | p.[Asn490_Met495delins(40)]; [Cys581*]              | p.[Arg440Serfs*3]; [Arg440Serfs*3] | p.[Glu122Glyfs*16]; [Glu122Glyfs*16] | p.[Ala149Glyfs*57]; [Val383_Gln420del] | p.[Tyr306*]; [Tyr306*]  | p.[Tyr306*]; [Tyr306*] | p.[Leu642Pro]; [Leu642Pro]               | p.[Val708Alafs*5]; [Val708Alafs*5]   | p.[Arg632*]; [Arg632*] | p.[Pro274Leufs*18]; [Trp750Arg] | p.[Glu338*]; [Arg644*] | p.[Glu766*]; [Glu795Glyfs*3] | p.[Ala975Profs*22]; [Ala975Profs*22] |
| Gestational Age (weeks); Birth parameters | NA                                                 | NA                                   | NA                                                  | NA                                 | 34 w; NA                             | NA                                     | NA                      | NA                     | 30 weeks. W: 1.2 kg, L: 44 cm            | 36 weeks. W: 2.4kg, L: 47 cm         | 34 weeks. NA           | Term. NA                        | 35 week. W: 2kg        | NA                           | 32 weeks. NA                         |
| Height (cm)                               | NA                                                 | NA                                   | NA                                                  | NA                                 | 192.6                                | 164                                    | 178                     | 191.5                  | 150 (target: 157)                        | 174.5 cm                             | NA                     | NA                              | NA                     | NA                           | 140                                  |
| Weight (kg)                               | NA                                                 | NA                                   | NA                                                  | NA                                 | 87                                   | NA                                     | 53                      | 67                     | 52                                       | 80                                   | NA                     | BMI22                           | NA                     | NA                           | 35                                   |
| Head circumference (cm)                   | NA                                                 | NA                                   | NA                                                  | NA                                 | 56                                   | NA                                     | 53                      | 56                     | NA                                       | NA                                   | NA                     | NA                              | NA                     | NA                           | 50.5                                 |
| Craniofacial features                     |                                                    |                                      |                                                     |                                    |                                      |                                        |                         |                        |                                          |                                      |                        |                                 |                        |                              |                                      |
| Alopecia/Thin sparse hair                 | NA                                                 | NA                                   | -                                                   | -                                  | +                                    | +                                      | +                       | NA                     | +                                        | -                                    | NA                     | +                               | +                      | +                            | +                                    |
| Atypical Dentition                        | Abnormal alignment                                 | Abnormal alignment                   | Retains a single baby tooth                         | NA                                 | Severe caries                        | Frequent caries                        | NA                      | NA                     | Pyorrhea, complete dental loss at age 14 | Multiple caries, periodontal disease | NA                     | Abnormal alignment              | NA                     | Multiple caries              | -                                    |
| Narrow thin facies/narrow high palate     | +                                                  | +                                    | -                                                   | -                                  | -                                    | -                                      | NA                      | NA                     | +                                        | -                                    | -                      | +                               |                        | +                            | +                                    |
| Webbed neck                               | +                                                  | +                                    | -                                                   | -                                  | +                                    | -                                      | NA                      | NA                     | -                                        | +                                    | NA                     | -                               | -                      | -                            | -                                    |

NA: features not reported; POTS: postural orthostatic tachycardia syndrome; SMA: Superior mesenteric artery; GER: Gastroesophageal reflux; †Prematurely aged appearance included ptosis, and sagging cheeks. , ‡, §, ¶

| Family No.                                       | I                                  |        | II                 | III          | IV                                                                                            | V           |        | VI     | VII    |        | VIII               | IX                                                                                                                            | X      | XI                         | XII                        | XIII        |                 |
|--------------------------------------------------|------------------------------------|--------|--------------------|--------------|-----------------------------------------------------------------------------------------------|-------------|--------|--------|--------|--------|--------------------|-------------------------------------------------------------------------------------------------------------------------------|--------|----------------------------|----------------------------|-------------|-----------------|
| Other craniofacial features                      | Low posterior hairline, large ears |        | -                  | Micrognathia | Asymmetrical face, hypertelorism, low-set and posteriorly rotated ears with attached earlobes | Mild ptosis |        | NA     | NA     |        | Elongated uvula    | Cleft palate, down-slanting palpebral fissures, epicanthus, deep set eyes, malar hypoplasia, low set ears, micro/retrognathia | NA     | Bilateral notched earlobes | Bilateral notched earlobes | Narrow nose | Thin nasal root |
| Cutaneous Features                               |                                    |        |                    |              |                                                                                               |             |        |        |        |        |                    |                                                                                                                               |        |                            |                            |             |                 |
| Skin hyperextensibility                          | +                                  | +      | +                  | +            | +                                                                                             | +           | +      | +      | +      | +      | +                  | +                                                                                                                             | +      | +                          | +                          | +           | +               |
| Thin, translucent skin                           | NA                                 | NA     | NA                 | +            | +                                                                                             | +           | +      | +      | +      | -      | +                  | +                                                                                                                             | +      | -                          | +                          | +           | +               |
| Excessive skin/skin folding                      | +                                  | +      | +                  | +            | +                                                                                             | -           | +      | +      | +      | +      | +                  | +                                                                                                                             | +      | +                          | +                          | +           | +               |
| Atrophic scars/Delayed wound healing             | +                                  | +      | +                  | +            | +                                                                                             | +           | +      | +      | +      | +      | +                  | +                                                                                                                             | +      | +                          | +                          | +           | +               |
| Easy bruising                                    | +                                  | NA     | +                  | +            | +                                                                                             | +           | +      | +      | +      | +      | +                  | +                                                                                                                             | +      | +                          | +                          | +           | +               |
| Piezogenic papules                               | NA                                 | NA     | +                  | +            | NA                                                                                            | NA          | NA     | NA     | NA     | +      | +                  | NA                                                                                                                            | NA     | +                          | -                          | -           | -               |
| Prematurely aged appearance                      | +                                  | +      | No; acrogeria only | NA           | +                                                                                             | NA          | +      | +      | +      | +      | No, acrogeria only | NA                                                                                                                            | NA     | NA                         | No, acrogeria only         | +           | +               |
| Skeletal Features                                |                                    |        |                    |              |                                                                                               |             |        |        |        |        |                    |                                                                                                                               |        |                            |                            |             |                 |
| Generalized joint hypermobility (Beighton score) | +(8/9)                             | +(NA)  | +(8/9)             | +(8/9)       | +(NA)                                                                                         | +(9/9)      | +(6/9) | -(2/9) | +(5/9) | +(7/9) | +(NA)              | +(3/9)                                                                                                                        | +(9/9) | +(8/9)                     | +(9/9)                     | +(9/9)      | +(9/9)          |
| Congenital hip dislocation                       | -                                  | -      | -                  | +            | -                                                                                             | -           | -      | NA     | NA     | NA     | -                  | +                                                                                                                             | -      | +                          | +                          | +           | +               |
| Other Dislocations; Subluxations                 | ++; NA                             | ++; NA | ++; +              | ++; NA       | ++; +                                                                                         | NA; +       | ++; +  | ++; NA | ++; NA | NA; +  | -                  | ++; NA                                                                                                                        | ++; NA | +                          | -;                         | -           | -               |
| Pes planus                                       | +                                  | +      | +                  | +            | +                                                                                             | +           | +      | +      | +      | -      | +                  | +                                                                                                                             | +      | +                          | +                          | +           | +               |
| Spine deformities                                | -                                  | NA     | -                  | +            | -                                                                                             | +           | +      | +      | +      | +      | -                  | +                                                                                                                             | -      | -                          | -                          | -           | +               |
| Hallux valgus                                    | +                                  | +      | +                  | +            | +                                                                                             | -           | -      | -      | +      | -      | NA                 | +                                                                                                                             | -      | -                          | -                          | -           | -               |
| Hammertoes                                       | +                                  | +      | +                  | +            | +                                                                                             | -           | -      | -      | -      | +      | NA                 | +                                                                                                                             | -      | -                          | -                          | -           | -               |
| Osteopenia                                       | +                                  | +      | +                  | +            | NA                                                                                            | -           | NA     | NA     | +      | -      | +                  | -                                                                                                                             | +      | NA                         | -                          | -           | -               |

NA: features not reported; POTS: postural orthostatic tachycardia syndrome; SMA: Superior mesenteric artery; GER: Gastroesophageal reflux; †Prematurely aged appearance included ptosis, and sagging cheeks. , ‡, §, ¶

| Family No.                    | I                                  |    | II                   | III                                                | IV                                          | V                                                        | VI                                                      |                                                                                    | VII                                                                                                              | VIII                                                                  | IX                             | X                                                                  | XI                                            | XII                                                      | XIII                   |
|-------------------------------|------------------------------------|----|----------------------|----------------------------------------------------|---------------------------------------------|----------------------------------------------------------|---------------------------------------------------------|------------------------------------------------------------------------------------|------------------------------------------------------------------------------------------------------------------|-----------------------------------------------------------------------|--------------------------------|--------------------------------------------------------------------|-----------------------------------------------|----------------------------------------------------------|------------------------|
| Other skeletal features       | NA                                 | NA | NA                   | Down slanting shoulders, severe hip osteoarthritis | Pectus excavatum, multiple ankle distortion | Down slanting shoulders, hip dysplasia, ankle sprains    | Arachnodactyly, wrist and thumb signs, systemic score 8 | Pectus excavatum, arachnodactyly, wrist sign, systemic score 7, hindfoot deformity | Rotator cuff disease & impingement, epithrochleitis, gonarthrosis, patellar instability, Achilles, tendonopathy, | Short stubby fingers, hips, dysmetria, absence and hypoplasia of toes | NA                             | Narrowing at C4-5 and C6-7, severe degenerative change to L2 to L5 | Bilateral talipes equinovarus, osteoarthritis | Toe/elbow joint deformity, ankle instability and sprains | Patella instability    |
| Neuromuscular features        |                                    |    |                      |                                                    |                                             |                                                          |                                                         |                                                                                    |                                                                                                                  |                                                                       |                                |                                                                    |                                               |                                                          |                        |
| Neonatal hypotonia            | +                                  | -  | -                    | NA                                                 | NA                                          | NA                                                       | NA                                                      | NA                                                                                 | +                                                                                                                | +                                                                     | -                              | NA                                                                 | NA                                            | -                                                        | -                      |
| Delayed motor development     | -                                  | -  | +                    | NA                                                 | NA                                          | NA                                                       | NA                                                      | NA                                                                                 | +                                                                                                                | +                                                                     | +                              | NA                                                                 | NA                                            | -                                                        | -                      |
| Muscle hypotrophy/hypoplasia  | NA                                 | +  | NA                   | NA                                                 | NA                                          | +, progressive                                           | NA                                                      | NA                                                                                 | Scapular girdle                                                                                                  | Pectorali major, diastasis recti                                      | NA                             | NA                                                                 | NA                                            | -                                                        | -                      |
| Cardiovascular features       |                                    |    |                      |                                                    |                                             |                                                          |                                                         |                                                                                    |                                                                                                                  |                                                                       |                                |                                                                    |                                               |                                                          |                        |
| Mitral prolapse/regurgitation | -                                  | -  | Prolapse             | Regurgitation                                      | Prolapse                                    | -                                                        | Prolapse                                                | -                                                                                  | -                                                                                                                | Regurgitation                                                         | NA                             | -                                                                  | -                                             | -                                                        | Pending echocardiogram |
| Aortic root dilation          | -                                  | -  | NA                   | +                                                  | -                                           | -                                                        | -                                                       | -                                                                                  | NA                                                                                                               | -                                                                     | -                              | +                                                                  | NA                                            | NA                                                       | -                      |
| Hematoma                      | -                                  | -  | NA                   | NA                                                 | NA                                          | +                                                        | -                                                       | -                                                                                  | NA                                                                                                               | +                                                                     | -                              | +                                                                  | +                                             | NA                                                       | -                      |
| Varicose veins                | -                                  | -  | NA                   | NA                                                 | NA                                          | -                                                        | -                                                       | +                                                                                  | +                                                                                                                | +                                                                     | -                              | -                                                                  | -                                             | NA                                                       | +                      |
| Other cardiovascular features | -                                  | -  | NA                   | Bilateral stenosis of carotids                     | NA                                          | POTS                                                     | Circular pericardial effusion                           | -                                                                                  | Peripheral artery disease                                                                                        | Regurgitation at tricuspid, pulmonary vales                           | SMA rupture                    | Dissection, dilation, aberrant, tortuosity                         | Transient ischemic attack, atrial flutter     | SMA aneurysm and rupture                                 | -                      |
| Other organ systems           |                                    |    |                      |                                                    |                                             |                                                          |                                                         |                                                                                    |                                                                                                                  |                                                                       |                                |                                                                    |                                               |                                                          |                        |
| Gastrointestinal features     | NA                                 | NA | Chronic constipation | Bowel rupture                                      | -                                           | GER, dysphagia, bloating, cramps, constipation, diarrhea | NA                                                      | NA                                                                                 | -                                                                                                                | NA                                                                    | Bowel rupture, paralytic ileus | NA                                                                 | -                                             | -                                                        | -, small appetite      |
| Hernias                       | Umbilical/ventral/inguinal hernias | NA | -                    | Surgical site                                      | Herniation of fat in the right armpit       | NA                                                       | +                                                       | -                                                                                  | Umbilical hernia                                                                                                 | Inguinal hernia                                                       | Surgical site                  | NA                                                                 | -                                             | Spinal disc hernia, umbilical hernia                     | Spinal disc hernia     |

NA: features not reported; POTS: postural orthostatic tachycardia syndrome; SMA: Superior mesenteric artery; GER: Gastroesophageal reflux; †Prematurely aged appearance included ptosis, and sagging cheeks. , ‡, §, ¶

| Family No.          | I                                   |    | II                                                                                               | III                                                  | IV                                                            | V                                                      | VI |                                                  | VII                                                                                                                                                                              | VIII               | IX                                                                           | X                  | XI                                                                                                                                                                                       | XII    | XIII                        |
|---------------------|-------------------------------------|----|--------------------------------------------------------------------------------------------------|------------------------------------------------------|---------------------------------------------------------------|--------------------------------------------------------|----|--------------------------------------------------|----------------------------------------------------------------------------------------------------------------------------------------------------------------------------------|--------------------|------------------------------------------------------------------------------|--------------------|------------------------------------------------------------------------------------------------------------------------------------------------------------------------------------------|--------|-----------------------------|
| Urogenital features | NA                                  | NA | Cryptor-<br>chid-<br>ism                                                                         | NA                                                   | NA                                                            | Bladder<br>cramps,<br>urinary<br>retention/<br>urgency | NA | Cryptor-<br>chidism                              | NA                                                                                                                                                                               | Cryptorchid<br>ism | Ovarian<br>mucinous<br>cystaden-<br>oma,<br>urinary<br>retention/<br>urgency | NA                 | -                                                                                                                                                                                        | -      | -                           |
| Other features      | Diabetes<br>mellitus,<br>cellulitis | NA | Im-<br>paired<br>temper-<br>ature<br>sensa-<br>tion,<br>kerato-<br>conjun-<br>ctivitis,<br>sicca | Elbow<br>bursitis,<br>hypertri-<br>glycerid-<br>emia | Spontan-<br>eous<br>pneumo-<br>thorax,<br>myopia,<br>tinnitus | Chronic<br>fatigue,<br>chronic<br>pain,<br>myopia,     | NA | Strabis-<br>mus,<br>astigma--<br>tism,<br>myopia | Vocal cord<br>nodules,<br>subcut-<br>aneous<br>spheroids,<br>multiple<br>papules<br>with<br>follicular<br>promin-<br>ence,<br>chronic<br>fatigue,<br>myopia,<br>astigma-<br>tism | Chronic<br>pain    | NA                                                                           | Chronic<br>fatigue | High<br>blood<br>pres-<br>sure,<br>hypo-<br>thyroid<br>-ism,<br>pre-<br>dia-<br>betes,<br>visual<br>loss in<br>right<br>eye,<br>small<br>old left<br>temp-<br>oral<br>lacunar<br>infarct | Myopia | Chronic<br>fatigue,<br>pain |
